# Supplementary material for: Mimic enzymatic preparation of conductive supramolecular-polymeric hydrogels with antibacterial and antioxidant properties for accelerating wound healing
Source: Royal Society of Chemistry journal article supplement (doi:10.1039/d2bm01416e), 2022-11-12
Supplement: d2bm01416e1.pdf [file d2bm01416e1.pdf]

## Supplementary Information

### Mimic enzymatic preparation of a conductive supramolecular-polymeric hydrogel with antibacterial and antioxidant properties for accelerating wound healing

Qingcong Wei,\* Yuke Wang, Liyang Jia, Guanglei Ma, Xiaofang Shi, Weiwei Zhang\* and Zhiguo Hu\*

Collaborative Innovation Centre of Henan Province for Green Manufacturing of Fine Chemicals, Key Laboratory of Green Chemical Media and Reactions, Ministry of Education, Henan Engineering Research Centre of Chiral Hydroxyl Phar Henan Engineering Research Centre of Chiral Hydroxyl Pharmaceutical, School of Chemistry and Chemical Engineering, Henan Normal University, Xinxiang, Henan 453007, China. E-mail: qcwei@htu.edu.cn, zhangweiwei@htu.edu.cn, zg@htu.cn

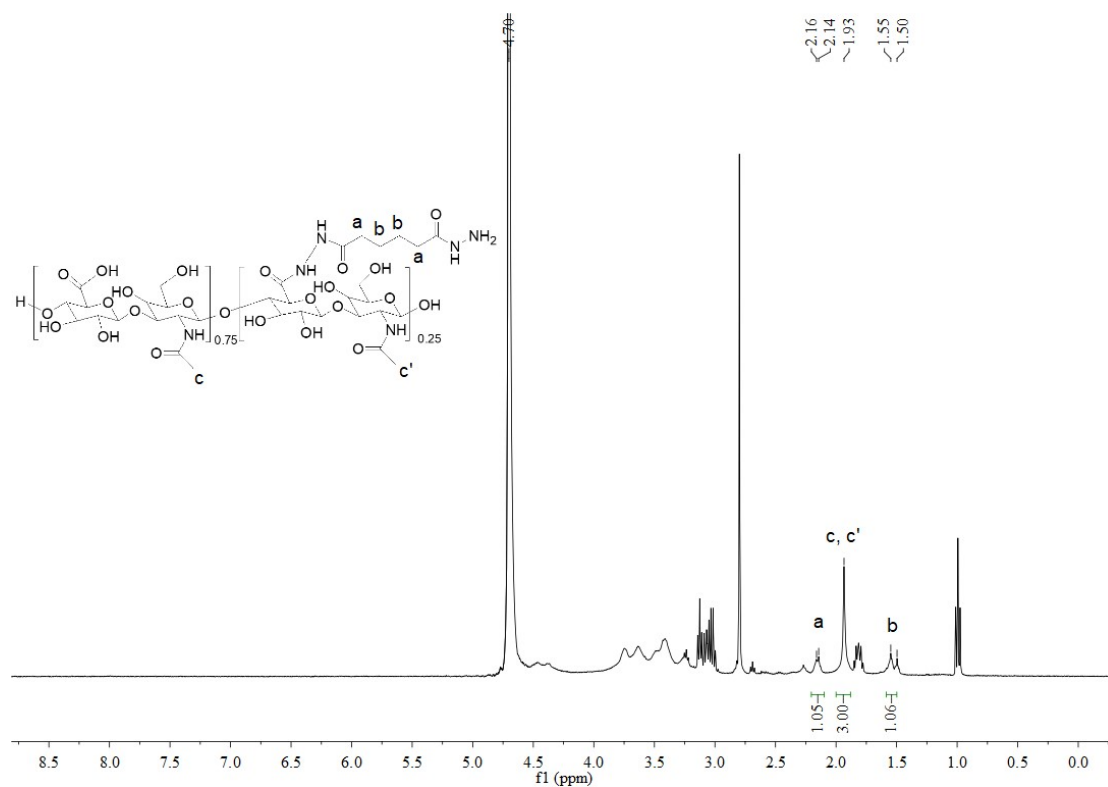

Fig. S1 <sup>1</sup>H NMR spectrum of AHHA (D<sub>2</sub>O).

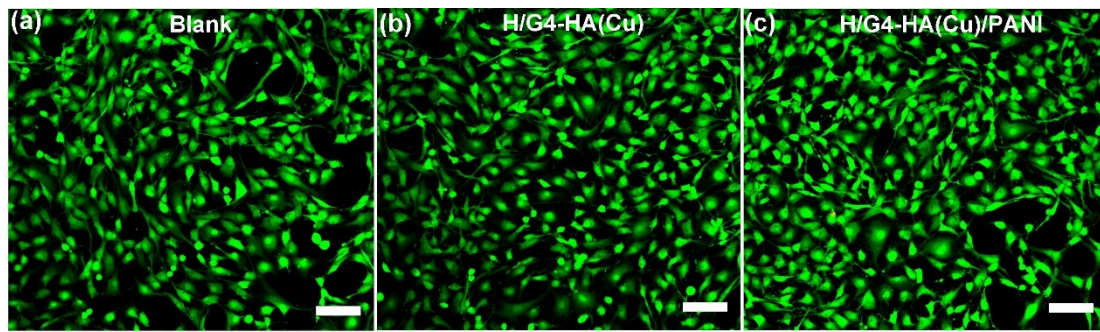

**Fig. S2** Live/Dead staining of NIH-3T3 cells after culturing with hydrogel extraction for 24 h. Scale bar: 100  $\mu$ m.

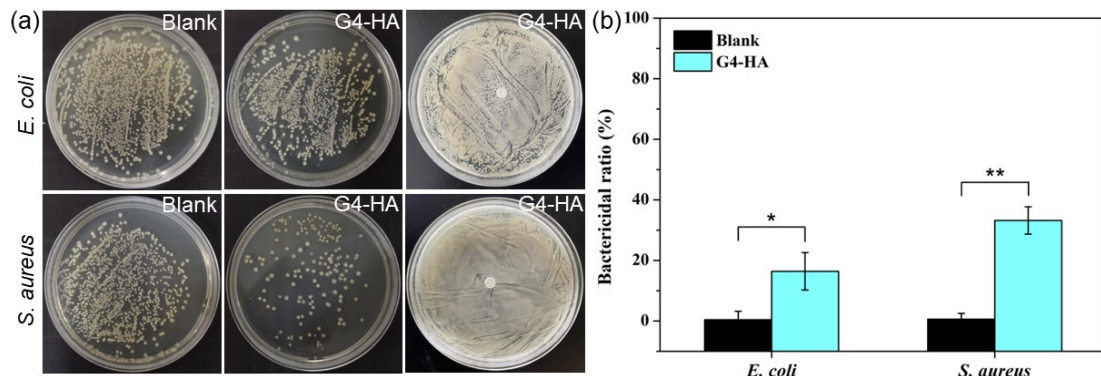

**Fig. S3** (a) Images of survival bacteria clones and inhibition zone after contacting G4-HA hydrogel. (b) Quantification data of the surface contact bactericidal ratio.
